# Supplementary material for: Reliability of dynamic and isometric upper muscle strength testing in breast cancer survivors
Source: PeerJ. 2024 Jul 23;12:e17576. doi: 10.7717/peerj.17576 (PMC11276762; doi:10.7717/peerj.17576)
Supplement: Supplemental Information 3 [file peerj-12-17576-s003.xlsx]

## Sheet: ibp_regressions_h
id	age	bw	higher	bmi	surgery	dominance	condition_surgery_same_side	hgs_l_1_test	hgs_l_2_test	hgs_l_3_test	hgs_r_1_test	hgs_r_2_test	hgs_r_3_test	hgs_l_1_retest	hgs_l_2_retest	hgs_l_3_retest	hgs_r_1_retest	hgs_r_2_retest	hgs_r_3_retest	hgs_l_test_max	hgs_l_test_mean	hgs_l_test_cv	hgs_l_retest_max	hgs_l_retest_mean	hgs_l_retest_cv	hgs_r_test_max	hgs_r_test_mean	hgs_r_test_cv	hgs_r_retest_max	hgs_r_retest_mean	hgs_r_retest_cv	hgs_l_test_restest_cv	hgs_r_test_restest_cv	hgs_asym_test	hgs_asym_retest	hgs_diff_l_test_restest	hgs_diff_r_test_restest	ibp_l_1_test	ibp_l_2_test	ibp_l_3_test	ibp_r_1_test	ibp_r_2_test	ibp_r_3_test	ibp_l_1_retest	ibp_l_2_retest	ibp_l_3_retest	ibp_r_1_retest	ibp_r_2_retest	ibp_r_3_retest
a	56	61.1	1.6	23.8672	right	right	yes	27.8	29	27.8	24.6	23.7	23.7	24.1	23.5	24	20	21.2	23.3	29	28.2	2.45681	24.1	23.8667	1.34688	24.6	24	2.16506	23.3	21.5	7.76897	11.77	7.7704	16.092	10.4335	-4.33333	-2.5	99.919	96.984	107.415	101.741	92.759	106.436	89.448	87.199	74.18	98.862	96.6215	84.3265
b	37	120.3	1.67	43.1353	right	right	yes	23.6	23.2	22.9	28.3	30.4	30.4	26.4	25.8	23.4	30	29.8	31.4	23.6	23.2333	1.51157	26.4	25.2	6.29941	30.4	29.7	4.08227	31.4	30.4	2.8677	5.74251	1.64717	24.4332	18.705	1.96667	0.7	155.755	153.39	149.548	121.291	121.737	124.805	149.052	148.007	151.714	143.044	142.462	151.848
c	64	77.4	1.62	29.4925	right	right	yes	30	28.4	28.6	31.6	32.7	33.9	27.9	28.2	28.7	32.3	32.8	31.9	30	29	3.00614	28.7	28.2667	1.42976	33.9	32.7333	3.51434	32.8	32.3333	1.39461	1.81098	0.869394	12.095	13.4213	-0.733333	-0.4	90.1853	92.375	89.3571	90.0633	85.8233	89.2142	75.0391	84.537	92.5996	68.4999	72.334	69.9217
d	48	56.5	1.56	23.2166	right	right	yes	23	24.6	23.1	24.6	25.7	24.5	25.1	24.6	25.5	26.5	25.8	25.9	24.6	23.5667	3.8032	25.5	25.0667	1.7989	25.7	24.9333	2.67045	26.5	26.0667	1.45241	4.36186	3.1427	5.63574	3.91134	1.5	1.13333	83.9613	77.5117	80.0366	72.5322	69.2549	77.2642	105.043	105.472	104.403	95.1419	94.0144	96.2021
e	53	58	1.54	24.4561	right	right	yes	26.9	26	24.3	29.9	29.7	27.7	26.9	25.4	26.4	26.9	30.1	28.7	26.9	25.7333	5.13091	26.9	26.2333	2.91142	29.9	29.1	4.18059	30.1	28.5667	5.6155	1.36069	1.30794	12.2796	8.51582	0.5	-0.533333	110.836	106.028	102.43	111.989	101.952	96.2988	98.7205	107.021	107.686	116.653	113.363	116.182
f	50	64.4	1.6	25.1562	left	right	no	19.2	20.5	18.6	22	24	23.3	20.3	24.1	27.1	22.4	26.8	26.8	20.5	19.4333	4.99787	27.1	23.8333	14.2986	24	23.1	4.39346	26.8	25.3333	10.0277	14.3818	6.52115	17.2414	6.10169	4.4	2.23333	117.528	103.576	116.808	105.289	89.1674	98.9179	139.1	151.15	154.398	117.935	139.068	141.743
g	60	72.3	1.55	30.0937	right	right	yes	16.03	14.8	15	22	16.6	20.2	16.2	16.6	18.2	17.6	18.2	17.9	16.03	15.2767	4.32048	18.2	17	6.2253	22	19.6	14.0283	18.2	17.9	1.67598	7.55085	6.4111	24.7921	5.15759	1.72333	-1.7	78.9933	72.717	58.9507	66.6917	72.1687	56.4981	64.8999	72.9729	68.7803	77.6965	67.2619	70.6025
h	49	59.7	1.46	28.0071	right	right	yes	19	20	18.5	23.3	25.6	25.7	19.3	21.2	20.2	24.8	25.6	25.9	20	19.1667	3.98485	21.2	20.2333	4.69739	25.7	24.8667	5.4599	25.9	25.4333	2.23574	3.82867	1.59322	25.8895	22.7737	1.06667	0.566667	107.172	123.308	107.711	99.9043	101.272	94.4427	120.042	128.181	112.879	117.391	118.021	118.109
i	52	72.3	1.653	26.4602	right	right	yes	29.2	31.7	29.1	28.9	29.3	28.5	32.8	31.5	31.1	33.6	32.4	31.6	31.7	30	4.91031	32.8	31.8	2.79503	29.3	28.9	1.38408	33.6	32.5333	3.09419	4.11907	8.36404	3.73514	2.27979	1.8	3.63333	113.274	109.638	120.614	120.609	120.776	116.796	107.215	116.457	119.916	120.58	136.849	123.788
j	61	77.7	1.63	29.2446	right	right	yes	28.8	26.3	27.6	30.5	32.1	32.1	27.2	27.9	29.7	31.8	30.4	31.9	28.8	27.5667	4.53567	29.7	28.2667	4.56263	32.1	31.5667	2.92638	31.9	31.3667	2.6737	1.77304	0.449432	13.5287	10.3969	0.7	-0.2	167.017	157.619	140.747	135.686	134.942	124.517	124.347	116.38	125.52	157.171	149.986	145.01
k	64	85	1.55	35.3798	left	left	yes	19.2	16.9	18.1	18.7	19.3	18.3	18.4	17.9	18.9	20	19.7	19.8	19.2	18.0667	6.36732	18.9	18.4	2.71739	19.3	18.7667	2.682	20	19.8333	0.770181	1.2927	3.90802	3.8009	7.49782	0.333333	1.06667	94.566	104.076	94.9745	85.5285	94.3435	84.9035	97.054	96.9945	107.978	87.384	99.364	95.823
l	36	85.9	1.61	33.1392	right	right	yes	28.6	30.3	29.7	27.8	29.8	28.7	29.2	28	28	28.6	29.6	27.5	30.3	29.5333	2.9193	29.2	28.4	2.43951	29.8	28.7667	3.48203	29.6	28.5667	3.677	2.76659	0.49333	2.63007	0.585138	-1.13333	-0.2	105.114	117.155	128.61	89.4655	94.5845	94.674	140.346	152.371	157.12	117.716	125.57	131.227
m	54	65.5	1.61	25.2691	left	right	no	24.9	22.8	22.7	23.9	26.7	24.8	25.4	25	25.6	21.5	23.6	25.1	24.9	23.4667	5.29393	25.6	25.3333	1.20594	26.7	25.1333	5.68748	25.1	23.4	7.72784	5.40956	5.05076	6.85871	7.93434	1.86667	-1.73333	83.5985	81.954	82.1605	91.003	91.9575	89.873	80.4445	77.8355	79.543	98.279	94.633	92.7485
n	52	69.6	1.61	26.8508	left	right	no	30.8	30	31	29.2	29.7	30.2	31.2	32.1	32.7	30.6	30.4	32	31	30.6	1.72925	32.7	32	2.35932	30.2	29.7	1.6835	32	31	2.81219	3.16278	3.02879	2.98507	3.1746	1.4	1.3	145.194	143.261	145.957	190.558	168.763	159.339	137.685	146.905	132.582	157.525	135.575	155.845
o	60	54.2	1.53	23.1535	right	right	yes	29.1	31.8	31.1	30.4	29.1	31.4	29.7	29.5	29.9	28.6	28	28.5	31.8	30.6667	4.5691	29.9	29.7	0.673401	31.4	30.3	3.80613	28.6	28.3667	1.13321	2.26462	4.66048	1.20284	4.59242	-0.966667	-1.93333	110.808	114.302	112.265	117.41	126.517	126.502	115.473	98.5974	109.948	108.26	104.697	111.02
p	49	62.6	1.61	24.1503	right	right	yes	33.7	32.2	32.3	33.4	32.9	31.7	32.3	33.6	34.6	31.6	32.6	33.3	33.7	32.7333	2.56207	34.6	33.5	3.44256	33.4	32.6667	2.67456	33.3	32.5	2.62892	1.63699	0.361691	0.203874	3.0303	0.766667	-0.166667	138.516	130.103	136.771	120.974	113.643	112.984	146.854	171.505	138.651	128.509	151.265	127.624
q	35	64.8	1.65	23.8017	left	right	no	30.2	29.7	30	27.7	29.8	29.5	30.4	31.1	31.9	31.6	29.2	30.6	30.2	29.9667	0.839804	31.9	31.1333	2.41078	29.8	29	3.91649	31.6	30.4667	3.95692	2.70035	3.48797	3.27869	2.1645	1.16667	1.46667	91.6942	104.741	93.9935	117.535	126.07	107.962	107.843	105.509	126.629	135.563	125.872	144.893
r	46	70	1.66	25.4028	left	right	no	22.9	21.7	24.7	27.6	33.3	30.2	23.9	23	25	28.4	27.1	27.4	24.7	23.1	6.53665	25	23.9667	4.17941	33.3	30.3667	9.39732	28.4	27.6333	2.46328	2.60408	6.66468	27.182	14.2119	0.866667	-2.73333	69.2935	71.191	69.782	69.8355	75.319	70.974	94.6585	91.8005	88.6685	91.51	91.522	91.737
s	52	67.6	1.58	27.079	left	right	no	11	8.2	10.7	16	16.1	19	15.2	15.1	14.3	15.5	15.6	16.3	11	9.96667	15.4246	15.2	14.8667	3.31808	19	17.0333	10.0034	16.3	15.8	2.7588	27.9046	5.31227	52.3457	6.08696	4.9	-1.23333	97.9561	89.9592	98.4486	113.059	108.409	119.573	84.2561	91.9547	94.6285	108.362	110.818	113.541
t	64	95.6	1.5	42.4889	right	right	yes	12.4	13.3	14.1	17.9	19.7	19.9	16.8	16.3	17.8	19.6	18.2	19.9	14.1	13.2667	6.41073	17.8	16.9667	4.50155	19.9	19.1667	5.74703	19.9	19.2333	4.71773	17.3074	0.245523	36.3823	12.523	3.7	0.0666667	82.5599	79.6033	77.0042	74.5531	77.558	78.2547	85.1306	84.8273	85.5788	94.9885	89.7237	88.272
u	52	77.6	1.56	31.8869	left	right	no	12	12.4	14.9	18.5	20.4	19.2	19.9	20.2	21.8	22.7	20.2	20.7	14.9	13.1	11.9971	21.8	20.6333	4.95042	20.4	19.3667	4.96163	22.7	21.2	6.23998	31.5822	6.39127	38.6037	2.70916	7.53333	1.83333	114.077	112.766	96.6513	119.754	116.169	96.479	91.7869	102.197	95.1927	79.8468	85.3233	79.9504
v	59	52.5	1.52	22.7233	right	right	yes	21.6	21.7	21.8	20.5	19.5	21.6	20.5	22.4	21.5	23.2	23.5	22.2	21.8	21.7	0.460829	22.4	21.4667	4.42751	21.6	20.5333	5.11557	23.5	22.9667	2.9638	0.76444	7.91093	5.52486	6.75169	-0.233333	2.43333	78.9581	70.4788	67.0592	70.4824	74.0961	68.5978	70.7272	67.4493	73.4858	63.5095	70.4143	71.5397
x	67	74.3	1.51	32.5863	right	left	no	24.8	24	25.3	22.8	20.8	20.9	25	26	24.4	22	20.8	20.1	25.3	24.7	2.65483	26	25.1333	3.21601	22.8	21.5	5.24159	22	20.9667	4.583	1.22975	1.77609	13.8528	18.0766	0.433333	-0.533333	113.376	109.435	113.288	119.849	122.412	108.159	101.959	95.6495	96.581	119.483	115.001	112.928
y	58	60	1.59	23.7332	right	right	yes	26.5	27.9	28.1	26.5	27.8	27.7	29.2	28.6	29.1	28	27.6	28.8	28.1	27.5	3.17011	29.2	28.9667	1.10974	27.8	27.3333	2.64665	28.8	28.1333	2.17184	3.67328	2.03973	0.607903	2.91886	1.46667	0.8	74.829	69.7095	69.0485	90.964	87.286	82.909	83.912	85.548	86.0315	94.209	90.778	96.0005
z	62	62.1	1.53	26.5283	right	right	yes	26.7	28.6	22.9	25.9	23.9	24.1	26	27.7	26.8	25.1	25.5	28	28.6	26.0667	11.1341	27.7	26.8333	3.16953	25.9	24.6333	4.47164	28	26.2	5.99856	2.04958	4.35856	5.65417	2.38843	0.766667	1.56667	77.511	78.924	70.6225	66.9185	72.6455	75.3825	84.078	78.482	76.1275	75.3545	68.669	66.7
aa	43	97.2	1.63	36.584	left	right	no	23.2	27.7	25	32.3	27.4	29.3	28.6	29.4	28.7	29.9	31.3	30.4	27.7	25.3	8.95237	29.4	28.9	1.50827	32.3	29.6667	8.3275	31.3	30.5333	2.32356	9.3933	2.03597	15.8884	5.49635	3.6	0.866667	71.43	65.6725	58.0725	92.016	74.9075	83.798	73.7435	77.788	77.153	82.8545	80.1485	93.4945
ab	45	55.9	1.475	25.6938	left	right	no	17	17.5	17.2	22.3	22.3	22.6	18.8	20.1	17.9	22.1	21.1	21.3	17.5	17.2333	1.46032	20.1	18.9333	5.84178	22.6	22.4	0.773237	22.1	21.5	2.46116	6.64746	2.8993	26.0723	12.6958	1.7	-0.9	101.725	105.716	107.403	108.574	104.21	104.548	103.145	97.2795	107.157	110.02	98.9235	107.707
ac	54	56.1	1.54	23.6549	left	right	no	21.1	20.8	18.1	24.1	25.1	26.3	25.1	25.4	25	29.1	26.7	28	21.1	20	8.26136	25.4	25.1667	0.827152	26.3	25.1667	4.37688	29.1	27.9333	4.30091	16.1774	7.36847	22.8782	10.4206	5.16667	2.76667	64.4611	71.6239	68.1747	72.9734	75.9321	75.2448	87.0549	87.4523	89.6664	105.153	99.477	104.136
ad	63	58.6	1.5	26.0444	right	right	yes	23.5	22.7	21.4	25.5	25.1	25.9	21.7	22.7	20.7	24.8	24.3	24.2	23.5	22.5333	4.70358	22.7	21.7	4.60829	25.9	25.5	1.56863	24.8	24.4333	1.31564	2.66431	3.02102	12.3525	11.8497	-0.833333	-1.06667	87.4393	91.4771	84.7696	86.3149	86.8517	85.1192	86.0634	89.7794	85.1097	76.1522	81.7064	73.6866
ae	46	68	1.57	27.5873	left	right	no	31.5	33.4	31.5	32	33.1	31	29.8	29.8	29.6	32	32.3	33.2	33.4	32.1333	3.41379	29.8	29.7333	0.388352	33.1	32.0333	3.27907	33.2	32.5	1.92154	5.48617	1.02268	0.311688	8.89127	-2.4	0.466667	82.8094	83.4658	85.1336	107.241	106.1	108.094	84.905	88.0459	82.8333	107.863	112.561	112.998
af	56	76.6	1.56	31.476	right	right	yes	26.9	25.5	26	33	30.2	30.2	26.5	27	27.8	31.2	30.8	29.8	26.9	26.1333	2.71477	27.8	27.1	2.41972	33	31.1333	5.19244	31.2	30.6	2.35657	2.56808	1.22178	17.4622	12.1317	0.966667	-0.533333	105.544	104.433	109.343	99.8112	95.0582	94.362	94.235	95.1653	105.44	89.7252	106.832	107.778
ag	60	62	1.61	23.9188	left	right	no	20.4	20.4	21.6	27.9	27.3	26.6	22.9	24.2	23.2	29.1	29.2	28.3	21.6	20.8	3.33087	24.2	23.4333	2.90478	27.9	27.2667	2.38621	29.2	28.8667	1.70885	8.41921	4.03101	26.9071	20.7776	2.63333	1.6	78.2766	75.2503	75.3175	83.5534	78.4006	79.7457	69.3191	65.0403	68.487	86.4687	77.0954	81.9753
[truncated: 99 more columns]

## Sheet: samplecharacteristics
id	age	bm	height	bmi	study_years	ethnicity_race	marital_status	ocupacao	hipertensao_arterial	diabetes	ipaq	diagnosis_cancer_date	date_assessment	months_diagnosis	surgery_date	surgery_months	surgery_type	surgery_side	breast_reconstruction	breast_reconstruction_type	cancer_stage	lymphonode_n	lymphedema	lymphedema_side	radiotherapy	chemotherapy	chemotherapy_type	hormonetherapy	hormonetherapy_medicene
a	56	61.1	1.6	23.8672	>8	white	single	retired	no	no	0	2019-03-01	2021-11-12	33	2019-03-01	33	mastectomy	right	no	NA	III	NA	no	NA	yes	yes	adjuvante	yes	tamoxifen
b	37	120.3	1.67	43.14	>8	brown_mixed	married	retired	yes	no	1920	2018-09-01	2020-02-04	17	2019-06-01	8	quadrantectomy	right	no	NA	I	3	yes	right	yes	yes	adjuvante	yes	tamoxifen
c	64	77.4	1.62	29.49	<8	white	married	cleaniner	no	no	600	2011-09-01	2021-01-06	100	2012-06-01	103	mastectomy	right	yes	latissimus_dorsi_flap	III	16	yes	both	yes	yes	neoadjuvante	yes	anastrazol
d	48	56.5	1.56	23.22	>8	white	married	janitor	no	no	636	2014-11-01	2021-02-09	75	2015-08-01	66	mastectomy	right	yes	abdominal_flap	I	9	no	NA	yes	yes	neoadjuvante	yes	tamoxifen
e	53	58	1.54	24.46	>8	white	married	freelancer	no	no	742.5	2019-06-01	2021-01-08	19	2019-08-01	17	mastectomy	right	no	NA	I	6	no	NA	yes	yes	adjuvante	yes	anastrazol
f	50	64.4	1.6	25.16	<8	white	divorced	retired	no	no	720	2017-06-01	2020-01-21	31	2017-10-31	26	quadrantectomy	left	no	NA	II	18	no	NA	yes	yes	adjuvante	yes	tamoxifen
g	60	72.3	1.55	30.09	<8	white	widow	dressmaker	no	no	198	2005-12-01	2021-02-23	241	2006-08-01	174	quadrantectomy	right	no	NA	I	9	yes	right	yes	yes	neoadjuvante	no	NA
h	36	59.7	1.46	28.01	>8	black	married	agent_educacional	no	no	0	2018-03-01	2021-01-07	34	2019-10-01	15	mastectomy	right	no	NA	III	11	yes	right	yes	yes	neoadjuvante	yes	anastrazol
i	52	72.3	1.653	26.46	>8	black	married	cleaniner	no	no	1920	2013-10-01	2021-01-21	87	2014-01-01	84	quadrantectomy	right	no	NA	II	2	yes	right	yes	yes	adjuvante	yes	tamoxifen
j	61	77.7	1.63	29.24	>8	brown_mixed	single	hairdresser	yes	no	0	2016-01-01	2020-01-30	48	2018-02-01	23	quadrantectomy	right	no	NA	II	3	no	NA	yes	yes	adjuvante	yes	tamoxifen
k	64	85	1.55	35.3798	<8	brown_mixed	single	housewife	yes	no	165	2018-04-01	2021-10-06	41	2019-02-01	32	quadrantectomy	left	no	NA	II	3	yes	left	yes	yes	neoadjuvante	yes	tamoxifen
l	36	85.9	1.61	33.1392	>8	brown_mixed	married	auxiliar_adm	no	no	0	2016-06-01	2021-09-10	63	2017-05-01	48	quadrantectomy	right	no	NA	III	7	no	NA	yes	yes	neoadjuvante	yes	anastrazol
m	54	65.5	1.61	25.2691	<8	black	single	dressmaker	no	no	990	2009-10-01	2021-01-12	135	2009-10-01	135	mastectomy	left	yes	NA	III	NA	no	NA	yes	yes	adjuvante	yes	tamoxifen
n	52	69.6	1.61	26.85	<8	brown_mixed	single	cleaning assistant	yes	no	330	2017-10-01	2020-12-29	51	2018-11-01	25	mastectomy	left	yes	NA	II	12	no	NA	yes	yes	adjuvante	yes	tamoxifen
o	60	54.2	1.53	23.15	<8	brown_mixed	married	cleaning assistant	no	no	720	2015-06-01	2020-11-21	65	2015-08-28	62	quadrantectomy	right	no	NA	I	8	no	NA	yes	yes	adjuvante	yes	tamoxifen
p	49	62.6	1.61	24.15	>8	brown_mixed	widow	retired	no	no	0	2016-05-01	2020-01-21	44	2017-02-01	35	mastectomy	right	no	NA	I	5	no	NA	yes	yes	adjuvante	yes	tamoxifen
q	35	64.8	1.65	23.8	>8	white	single	psychologist	no	no	0	2018-08-01	2021-01-12	29	2019-06-01	19	mastectomy	left	no	NA	I	5	no	NA	no	no	NA	yes	tamoxifen
r	46	70	1.66	25.4028	>8	white	divorced	teacher	no	no	2085	2020-02-01	2021-10-22	20	2020-03-01	19	quadrantectomy	left	no	NA	II	3	no	NA	yes	yes	adjuvante	yes	tamoxifen
s	52	67.6	1.58	27.08	>8	brown_mixed	married	norse	yes	no	2370	2019-02-01	2021-01-21	26	2019-04-01	21	quadrantectomy	left	no	NA	III	5	yes	both	yes	yes	adjuvante	yes	tamoxifen
t	64	95.6	1.5	42.49	<8	white	single	housewife	yes	no	0	2016-12-01	2021-02-09	50	2017-01-01	49	quadrantectomy	right	no	NA	II	12	yes	right	yes	yes	adjuvante	yes	anastrazol
u	52	77.6	1.56	31.8869	<8	white	married	street vendor	no	no	1062	2017-01-01	2021-01-05	36	2019-10-01	15	mastectomy	left	yes	abdominal_flap	III	9	yes	left	yes	yes	adjuvante	yes	tamoxifen
v	59	52.5	1.52	22.72	<8	brown_mixed	married	retired	no	no	82.5	2017-10-01	2019-11-05	25	2018-09-01	14	quadrantectomy	right	no	NA	III	10	no	NA	yes	yes	adjuvante	yes	anastrazol
x	67	74.3	1.51	32.5863	<8	brown_mixed	widow	retired	no	no	990	2017-09-01	2021-09-10	48	2017-11-01	46	quadrantectomy	right	no	NA	II	6	no	NA	yes	yes	adjuvante	yes	anastrazol
y	58	60	1.59	23.7332	<8	black	married	retired	yes	no	0	2010-07-01	2021-10-27	63	2010-06-01	48	mastectomy	right	no	NA	III	9	yes	right	yes	yes	adjuvante	yes	tamoxifen
z	62	62.1	1.53	26.5283	>8	brown_mixed	married	nurse_technician	no	no	0	2019-07-01	2021-10-22	30	2019-11-01	25	quadrantectomy	right	no	NA	III	11	yes	right	yes	yes	adjuvante	yes	tamoxifen
aa	43	97.2	1.63	36.584	<8	brown_mixed	married	housewife	no	no	0	2013-02-01	2021-10-08	104	2014-01-01	93	quadrantectomy	left	no	NA	I	5	no	NA	yes	yes	neoadjuvante	yes	tamoxifen
ab	45	55.9	1.475	25.6938	<8	brown_mixed	single	housewife	no	no	960	2020-03-01	2021-09-22	14	2020-05-01	17	mastectomy	left	no	NA	II	3	no	NA	yes	yes	neoadjuvante	no	NA
ac	54	56.1	1.54	23.65	>8	white	married	seller	no	no	240	2019-01-01	2020-01-15	24	2019-02-01	11	quadrantectomy	left	no	NA	III	18	yes	left	yes	yes	neoadjuvante	yes	tamoxifen
ad	63	58.6	1.5	26.04	>8	white	divorced	industrial_model_maker	no	no	0	2016-11-01	2021-02-09	52	2017-11-01	39	mastectomy	right	no	NA	III	14	no	NA	no	yes	neoadjuvante	yes	tamoxifen
ae	46	68	1.57	27.59	>8	brown_mixed	married	manicure	no	no	990	2018-12-01	2021-01-19	26	2019-03-01	22	quadrantectomy	left	no	NA	II	3	no	NA	yes	yes	adjuvante	yes	anastrazol
af	56	76.6	1.56	31.48	<8	brown_mixed	widow	housewife	no	no	786	2017-08-01	2021-02-16	42	2018-05-01	33	mastectomy	right	no	NA	III	10	no	NA	yes	yes	adjuvante	no	NA
ag	60	62	1.61	23.92	<8	brown_mixed	single	housewife	yes	no	0	2014-01-01	2021-01-28	84	2014-06-01	79	mastectomy	left	no	NA	III	13	no	NA	yes	yes	adjuvante	yes	anastrazol
